# Supplementary material for: Serological Correlates of Protection Induced by COVID-19 Vaccination in the Working Age Population: A Systematic Review and Meta-Analysis
Source: MDPI journal article supplement (doi:10.3390/vaccines12050494), 2024-05-03
Supplement: s1 [file s1]

Supplementary File S1.

Critical appraisal of cohort studies included in the present systematic review.

| Study                         | Domain 1 | Domain 2 | Domain 3 | Domain 4 | Domain 5 | Domain 6 | Domain 7 | Domain 8 | Domain 9 | Domain 10 | Domain 11 |
|-------------------------------|----------|----------|----------|----------|----------|----------|----------|----------|----------|-----------|-----------|
| Atef S. et al., 2023          | Yes      | Yes      | Yes      | Yes      | Yes      | NA       | Yes      | No       | Yes      | NA        | Yes       |
| Dimeglio C. et al., 2022      | Yes      | Yes      | Yes      | Yes      | Unclear  | NA       | Yes      | Yes      | Yes      | NA        | Yes       |
| Fong Y. et al., 2022          | Yes      | Yes      | Yes      | Yes      | Yes      | NA       | Yes      | No       | Yes      | NA        | Yes       |
| Fong Y. et al., 2023          | Yes      | Yes      | Yes      | Yes      | Yes      | NA       | Yes      | No       | Yes      | NA        | Yes       |
| Gilbert P.B. et al., 2022     | Yes      | Yes      | Yes      | Yes      | Yes      | NA       | Yes      | No       | Yes      | NA        | Yes       |
| Gilboa M. et al., 2023        | Yes      | Yes      | Yes      | Yes      | Yes      | NA       | Yes      | Unclear  | Yes      | NA        | Yes       |
| Hertz T. et al., 2023         | Yes      | Yes      | Yes      | Yes      | Yes      | NA       | Yes      | Yes      | Yes      | NA        | Yes       |
| Macrae K. et al., 2022        | Yes      | Yes      | Yes      | Yes      | No       | NA       | Yes      | No       | Yes      | NA        | Yes       |
| Marking U. et al., 2023       | Yes      | Yes      | Yes      | Yes      | Yes      | NA       | Yes      | No       | Yes      | NA        | Yes       |
| Möhlendick B. et al., 2022    | Yes      | Yes      | Yes      | Unclear  | No       | NA       | Yes      | Unclear  | Yes      | NA        | Yes       |
| Perez-Saez J. et al., 2023    | Yes      | Yes      | Yes      | No       | No       | NA       | Yes      | Unclear  | Yes      | NA        | Yes       |
| Regenhardt E. et al., 2023    | Yes      | Yes      | Yes      | Yes      | Yes      | NA       | Yes      | Unclear  | Yes      | NA        | Yes       |
| Regev-Yochay, G. et al., 2023 | Yes      | Yes      | Yes      | Yes      | Yes      | NA       | Yes      | Yes      | Yes      | NA        | Yes       |
| Roy A. et al., 2023           | Yes      | Yes      | Yes      | Yes      | Yes      | NA       | Yes      | Yes      | Yes      | NA        | Yes       |
| Sendi P. et al., 2023         | Yes      | Yes      | Yes      | Yes      | Yes      | NA       | Yes      | Unclear  | Yes      | NA        | Yes       |
| Wei J. et al., 2022           | Yes      | Yes      | Yes      | Yes      | Yes      | NA       | Yes      | No       | Yes      | NA        | Yes       |

Critical appraisal of cross-sectional studies included in the present systematic review.

| Study                           | Domain 1 | Domain 2 | Domain 3 | Domain 4 | Domain 5 | Domain 6 | Domain 7 | Domain 8 |
|---------------------------------|----------|----------|----------|----------|----------|----------|----------|----------|
| Goldblatt D. et al., 2021       | Unclear  | Yes      |
| Fernández-Rivas G. et al., 2022 | Yes      | Yes      | Yes      | Yes      | Yes      | Unclear  | Yes      | Yes      |
